# Supplementary material for: Nanosized iron telluride for simultaneous nanomolar voltammetric determination of dopamine, uric acid, guanine and adenine
Source: Royal Society of Chemistry journal article supplement (doi:10.1039/c9nj02329a), 2019-01-01
Supplement: c9nj02329a1.pdf [file c9nj02329a1.pdf]

## Electronic Supplementary Material

### **Nanosized iron telluride for simultaneous nanomolar voltammetric determination of dopamine, uric acid, guanine and adenine**

Susmita Pradhan<sup>a</sup>, Susmita Pramanik<sup>b</sup>, Dipak K Das<sup>b</sup>, Radhaballabh Bhar<sup>a</sup>, Rajib Bandyopadhyay<sup>c,d</sup>, Paul Millner<sup>e</sup>, Panchanan Pramanik<sup>b,\*</sup>

<sup>a</sup>Department of Instrumentation Science, Jadavpur University, Kolkata-700032, India

<sup>b</sup>Department of Chemistry and Nanoscience, GLA University, Mathura-281406, India

<sup>c</sup>Department of Instrumentation and Electronics Engineering, Jadavpur University, Salt Lake Campus, Sector-III, Kolkata-700098, India

<sup>d</sup>Laboratory of Artificial Sensory Systems, ITMO University, Saint Petersburg, Russia-197101

<sup>e</sup>Faculty of Biological Sciences, University of Leeds, LS29JT, UK

<sup>f</sup>Nanotechnology & Catalysis Research Centre Level 3, Block A, Institute for Advanced Studies, University of Malaya, Kuala Lumpur, MALAYSIA- 50603

\*Email: [pramanik1946@gmail.com](mailto:pramanik1946@gmail.com)

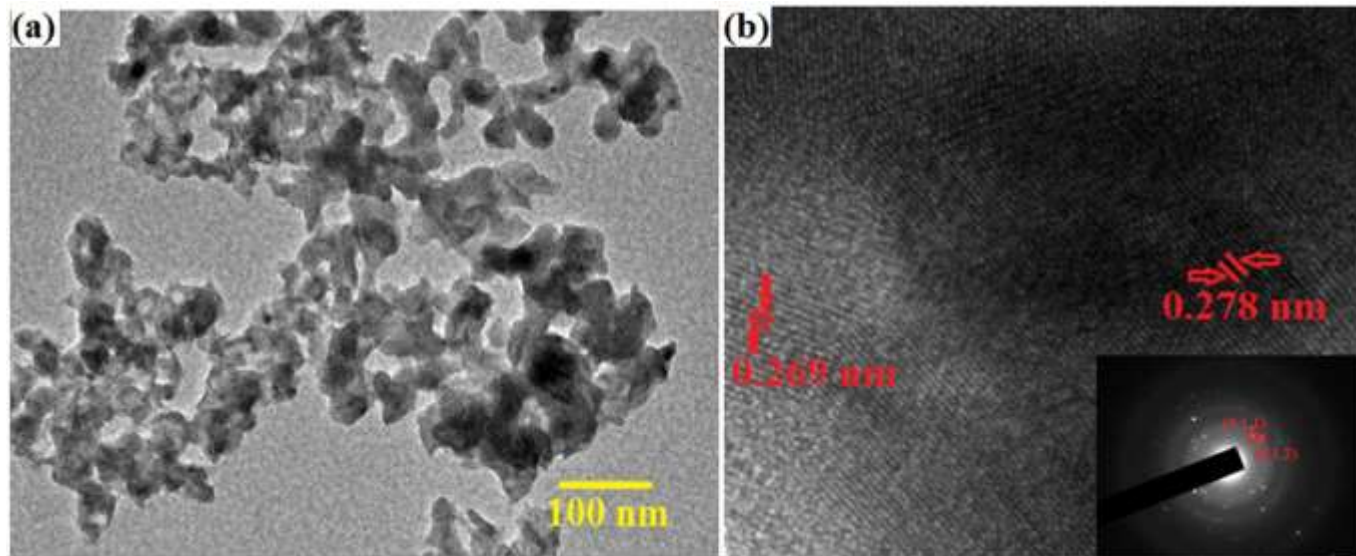

**Fig. S1** (a) TEM image of synthesized FeTe<sub>2</sub> nps (b) HRTEM image of FeTe<sub>2</sub> nanomaterial, inset shows SAED diffraction pattern

Table S1: Comparison of CV experimental results obtained from bare GP and FeTe<sub>2</sub>/GP electrodes

| Electrodes            | Concentration (μM) |     |     |     | Oxidation peak potential (mV) |     |     |      | Reduction peak potential (mV) |    |    |    | Oxidation peak current (μA) |       |       |       |
|-----------------------|--------------------|-----|-----|-----|-------------------------------|-----|-----|------|-------------------------------|----|----|----|-----------------------------|-------|-------|-------|
|                       | DA                 | UA  | GU  | AD  | DA                            | UA  | GU  | AD   | DA                            | UA | GU | AD | DA                          | UA    | GU    | AD    |
| FeTe <sub>2</sub> /GP | 100                | 0   | 0   | 0   | 393                           | -   | -   | -    | 266                           | -  | -  | -  | 10.75                       | -     | -     | -     |
| Bare GP               | 100                | 0   | 0   | 0   | 407                           | -   | -   | -    | 241                           | -  | -  | -  | 3.08                        | -     | -     | -     |
| FeTe <sub>2</sub> /GP | 0                  | 100 | 0   | 0   | -                             | 457 | -   | -    | -                             | -  | -  | -  | -                           | 10.93 | -     | -     |
| Bare GP               | 0                  | 100 | 0   | 0   | -                             | 478 | -   | -    | -                             | -  | -  | -  | -                           | 5.57  | -     | -     |
| FeTe <sub>2</sub> /GP | 0                  | 0   | 100 | 0   | -                             | -   | 881 | -    | -                             | -  | -  | -  | -                           | -     | 11.01 | -     |
| Bare GP               | 0                  | 0   | 100 | 0   | -                             | -   | 890 | -    | -                             | -  | -  | -  | -                           | -     | 8.05  | -     |
| FeTe <sub>2</sub> /GP | 0                  | 0   | 0   | 100 | -                             | -   | -   | 1164 | -                             | -  | -  | -  | -                           | -     | -     | 16.38 |
| Bare GP               | 0                  | 0   | 0   | 100 | -                             | -   | -   | 1184 | -                             | -  | -  | -  | -                           | -     | -     | 10.41 |
| FeTe <sub>2</sub> /GP | 50                 | 100 | 50  | 120 | 370                           | 516 | 901 | 1254 | 255                           | -  | -  | -  | 8.84                        | 11.2  | 9.52  | 21.44 |
| Bare GP               | 50                 | 100 | 50  | 120 | -                             | -   | 954 | 1281 | -                             | -  | -  | -  | -                           | -     | 5.81  | 12.21 |

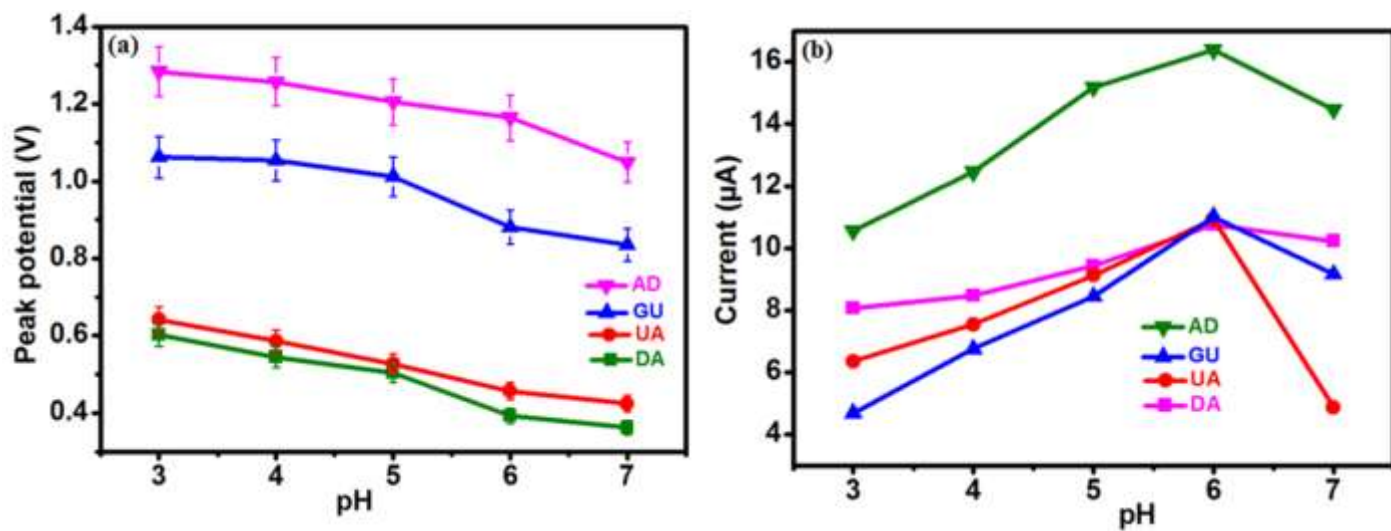

**Fig. S2** Variation of (a) pH vs peak potential and (b) pH vs current plot in 0.1 mM DA, 0.1 mM UA, 0.1 mM GU, 0.1 mM AD at FeTe<sub>2</sub>/GP electrode respectively.

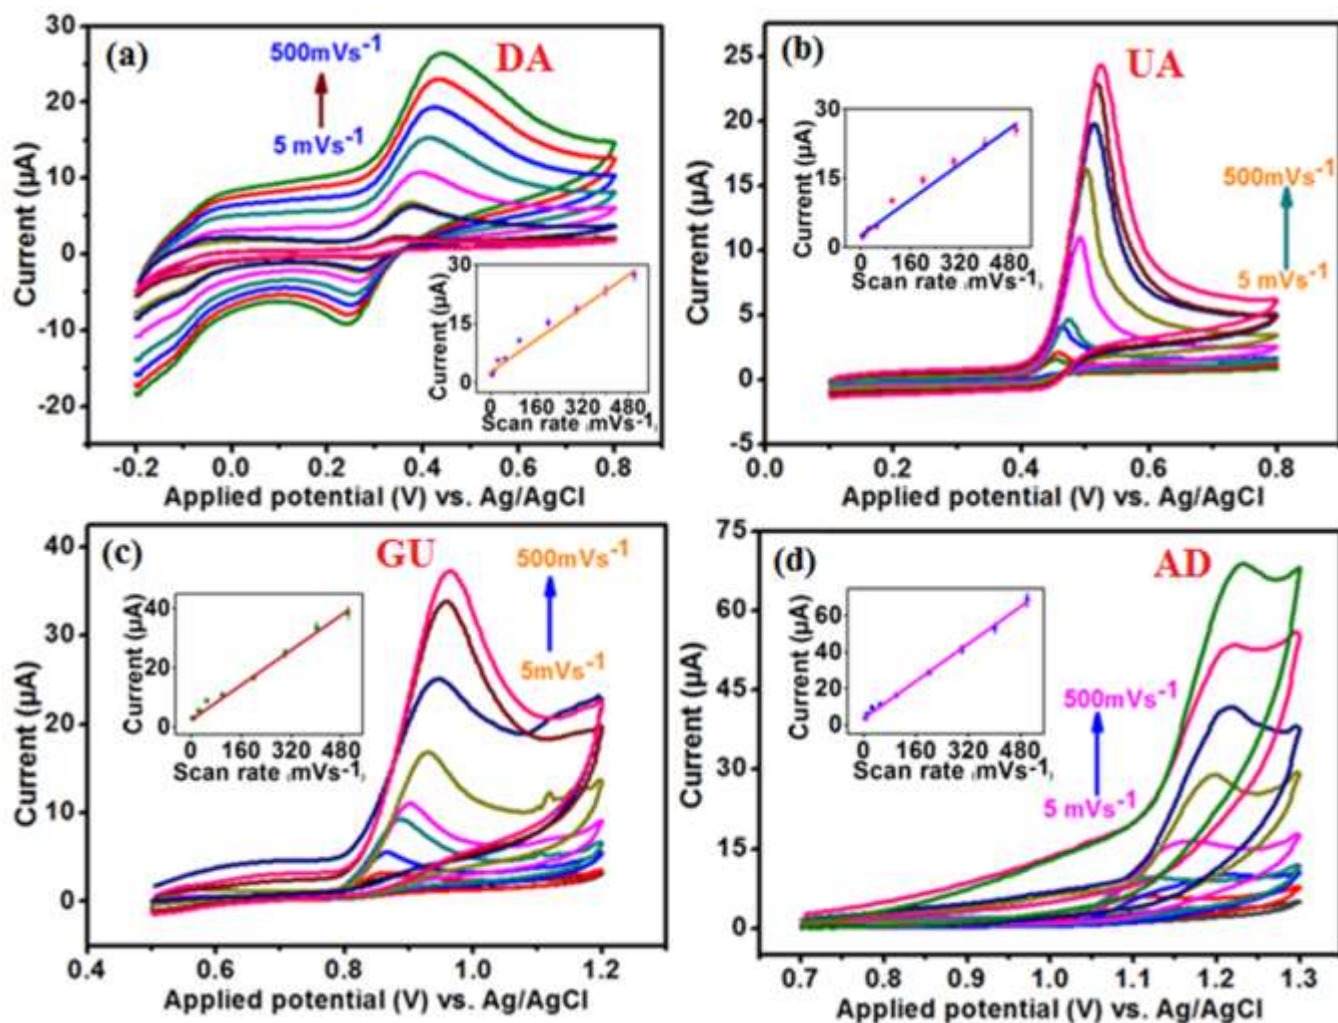

**Fig. S3** CV plots of scan rate variation ranging from 5 mVs<sup>-1</sup> to 500 mVs<sup>-1</sup> at FeTe<sub>2</sub>/GP electrode in presence of (a) 0.1 mM DA; inset shows corresponding oxidation peak current vs scan rate, (b) 0.1 mM UA; inset shows corresponding anodic peak current vs scan rate, (c) 0.1 mM GU; inset depicts oxidation peak current vs scan rate and (d) 0.1 mM AD; inset indicates corresponding oxidation peak current vs scan rate plot.

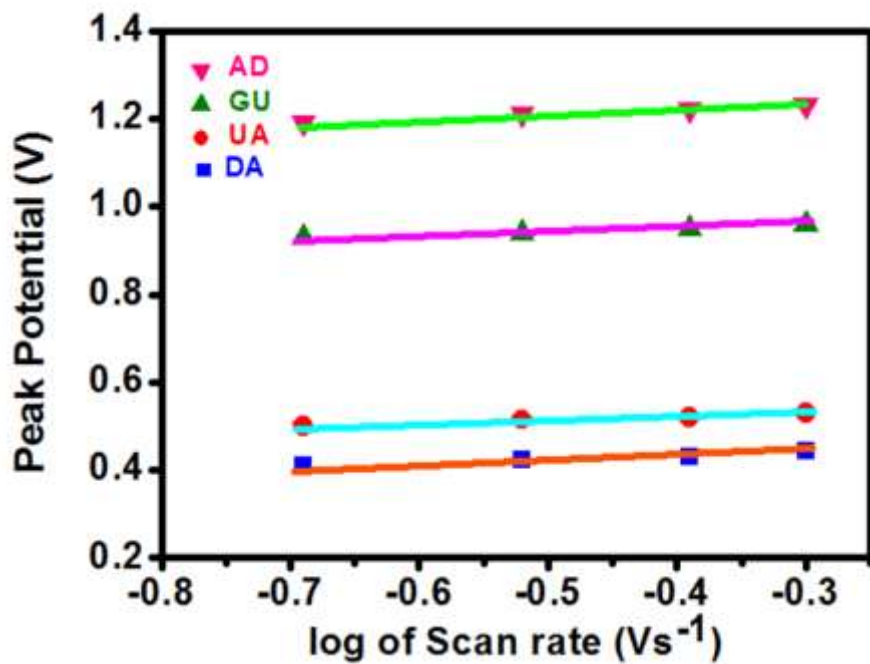

**Fig. S4** peak potential vs. logarithm of scan rate variation plot in 0.1 mM DA, 0.1 mM UA, 0.1 mM GU and 0.1 mM AD at FeTe<sub>2</sub>/GP electrode

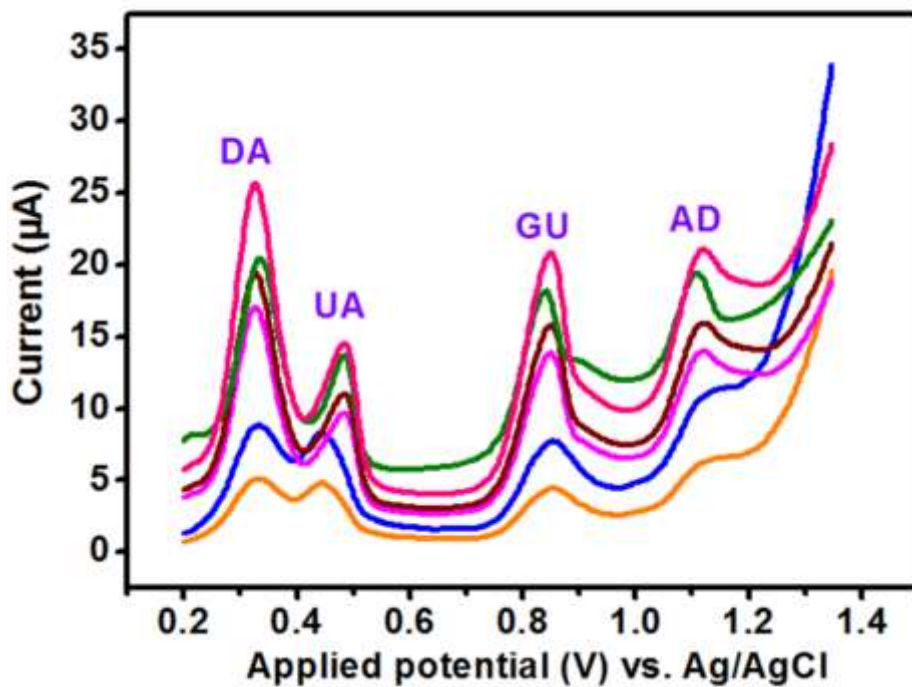

**Fig. S5** DPVs of different concentrations of DA, UA, GU and AD in 0.1 M PBS (pH=6) at FeTe<sub>2</sub>/GP electrode.

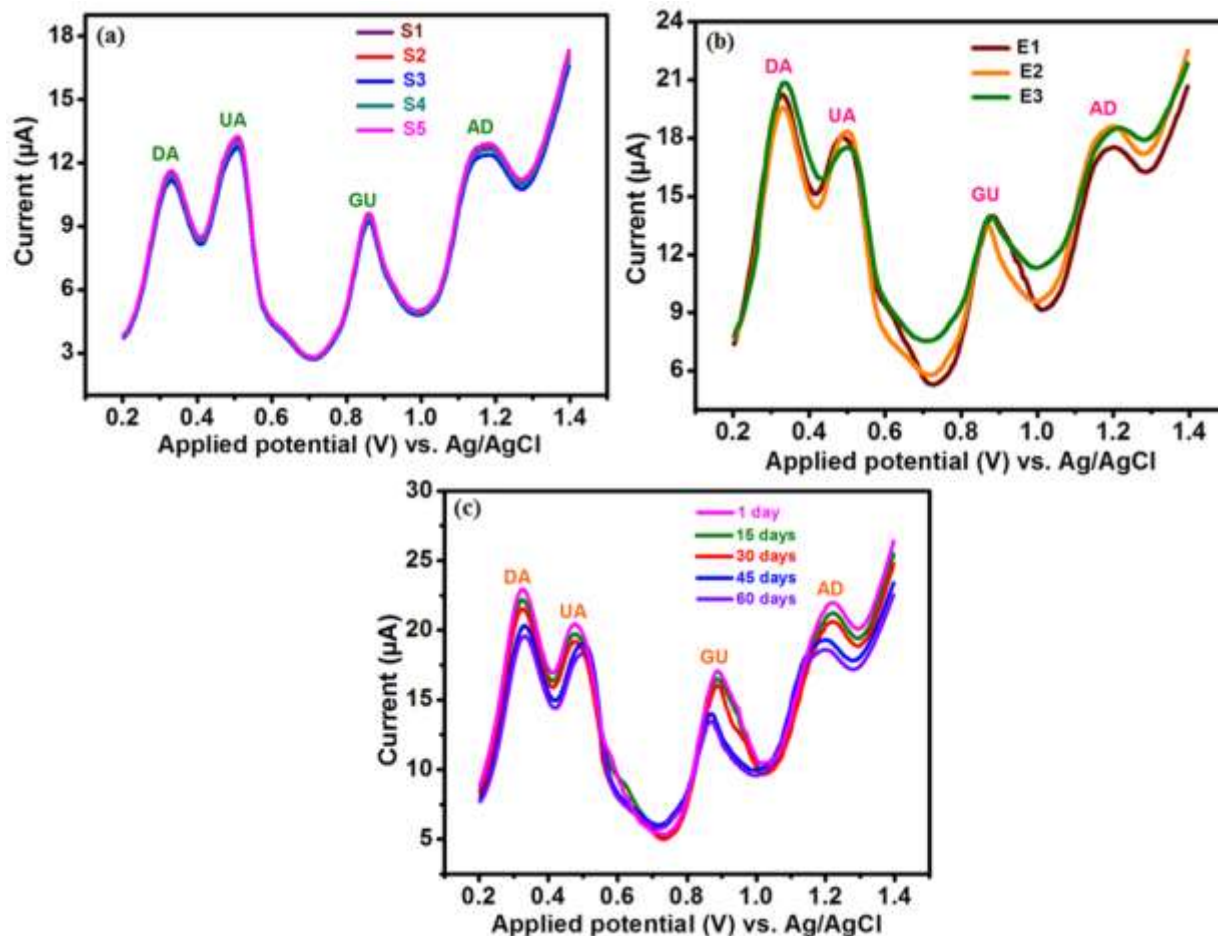

**Fig.S6** (a) Five successive DPV measurements of DA, UA, GU and AD at FeTe<sub>2</sub>/GP in the ternary mixture of 0.03 mM DA + 0.04 mM UA + 0.04 mM GU + 0.02 mM AD; (b) DPVs of mixture of 0.12 mM DA + 0.1 mM UA + 0.1 mM GU + 0.06 mM AD at prepared three different FeTe<sub>2</sub>/GP electrodes under same condition and (c) DPV plots of mixture of 0.12 mM DA + 0.15 mM UA + 0.14 mM GU + 0.08 mM AD at different time intervals.



Table S2: Influence of various foreign substances towards the peak current of DA, UA, GU and AD

| Various interferences        | Peak current ( $\mu\text{A}$ ) |       |      |       | Relative signal change (%) |       |       |       |
|------------------------------|--------------------------------|-------|------|-------|----------------------------|-------|-------|-------|
|                              | DA                             | UA    | GU   | AD    | DA                         | UA    | GU    | AD    |
| No interferences             | 10.57                          | 9.65  | 8.7  | 16.3  | -                          | -     | -     | -     |
| Na <sup>+</sup>              | 11.03                          | 10.03 | 9.05 | 17.08 | 4.35                       | 3.93  | 4.02  | 4.78  |
| K <sup>+</sup>               | 11.01                          | 10.11 | 8.87 | 16.96 | 4.35                       | 4.66  | 1.95  | 4.04  |
| Cl <sup>-</sup>              | 10.88                          | 10.08 | 9.09 | 17.06 | 2.93                       | 4.76  | 4.48  | 4.66  |
| NO <sub>3</sub> <sup>-</sup> | 10.47                          | 9.7   | 8.92 | 16.05 | -0.94                      | 0.52  | 2.53  | -1.53 |
| Ascorbic acid (AA)           | 10.25                          | 9.48  | 9.02 | 16    | -3.02                      | -1.76 | 3.67  | 1.84  |
| Citric acid (CA)             | 10.72                          | 9.95  | 9.17 | 16.78 | 1.42                       | 3.1   | 4.71  | 2.94  |
| Adrenaline (ADR)             | 10.55                          | 9.57  | 8.79 | 16.45 | -0.19                      | -0.83 | -1.03 | 0.92  |
| Cysteine (CY)                | 10.13                          | 9.42  | 8.43 | 15.67 | -4.16                      | -2.38 | -3.1  | -3.86 |
| Glucose                      | 10.42                          | 9.69  | 8.95 | 15.93 | -1.42                      | 0.41  | 2.87  | -2.26 |
| Sucrose                      | 10.73                          | 9.81  | 8.9  | 16.61 | 1.51                       | 1.55  | 2.29  | 1.9   |

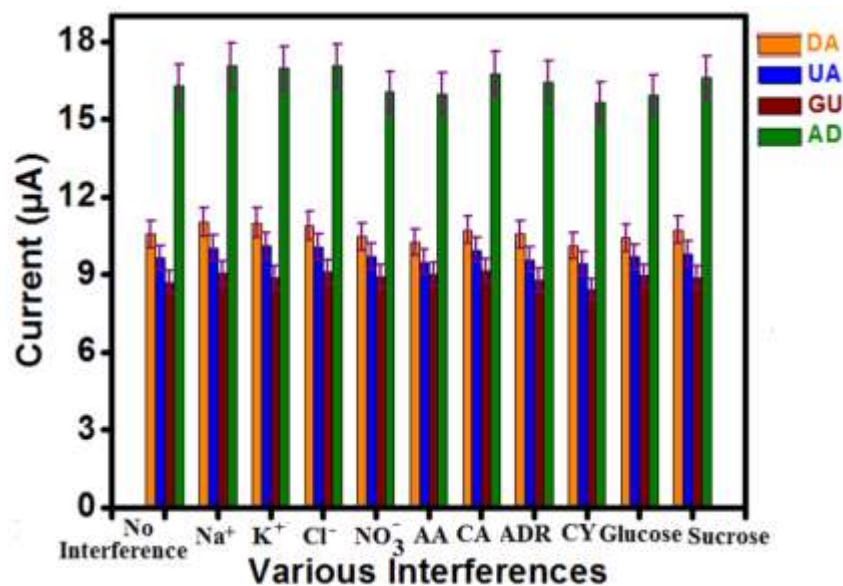

**Fig. S7** Influence of some interfering agents (metals and bio-molecules) to the voltammetric peak current responses of 0.02 mM DA, 0.01 mM UA, 0.02 mM GU and 0.06 mM AD molecules in PBS (pH 6) at FeTe<sub>2</sub>/GP electrode.

Table S3: Real sample analysis using FeTe<sub>2</sub>/GP electrode

| Sample                                         | Original (μM) | Spiking (μM) | Found (μM) | Reference Method | <sup>a</sup> Recovery± <sup>b</sup> SD (n=3) | % <sup>c</sup> RSD | <sup>1</sup> t <sub>exp</sub> | <sup>2</sup> t <sub>std</sub> | <sup>3</sup> F <sub>exp</sub> | <sup>4</sup> F <sub>std</sub> |
|------------------------------------------------|---------------|--------------|------------|------------------|----------------------------------------------|--------------------|-------------------------------|-------------------------------|-------------------------------|-------------------------------|
| <b><u>Human Urine Sample</u></b>               |               |              |            |                  |                                              |                    |                               |                               |                               |                               |
| DA                                             | 00            | 10           | 9.96       | 10.12            | 99.6± 0.94                                   | 0.95               | 1.19                          | 4.303                         | 15.99                         | 19                            |
| UA                                             | 15            | 5            | 20.01      | 19.86            | 100.2 ± 0.86                                 | 0.86               | 2.71                          | 4.303                         | 1.47                          | 19                            |
| GU                                             | 00            | 10           | 10.27      | 9.75             | 102.7 ± 2.45                                 | 2.39               | 1.12                          | 4.303                         | 2.39                          | 19                            |
| AD                                             | 00            | 10           | 10.14      | 10.42            | 101.4 ± 1.90                                 | 1.88               | 3.43                          | 4.303                         | 0.30                          | 19                            |
| <b><u>Human Plasma Sample</u></b>              |               |              |            |                  |                                              |                    |                               |                               |                               |                               |
| DA                                             | 00            | 10           | 10.43      | 10.38            | 104.3 ± 1.67                                 | 1.61               | 2.53                          | 4.303                         | 2.59                          | 19                            |
| UA                                             | 10            | 10           | 20.07      | 20.24            | 100.7 ± 1.55                                 | 1.54               | 1.72                          | 4.303                         | 1.58                          | 19                            |
| GU                                             | 00            | 10           | 10.26      | 10.15            | 102.6 ± 1.77                                 | 1.74               | 2.19                          | 4.303                         | 1.05                          | 19                            |
| AD                                             | 00            | 10           | 10.28      | 10.36            | 102.8 ± 1.22                                 | 1.19               | 1.42                          | 4.303                         | 0.43                          | 19                            |
| <b><u>Dopamine hydrochloride injection</u></b> |               |              |            |                  |                                              |                    |                               |                               |                               |                               |
| DA                                             | 20            | 20           | 39.46      | 40.14            | 97.3 ± 1.21                                  | 1.24               | 1.31                          | 4.303                         | 6.53                          | 19                            |

$${}^a\text{Recovery} = \frac{\text{Found}(\mu\text{M}) - \text{Diluted biological fluids/pharmaceutical sample}(\mu\text{M})}{\text{Spiking}(\mu\text{M})} \times 100\%; \text{ } {}^b\text{Standard}$$

deviation; <sup>c</sup>Relative standard deviation

<sup>1</sup>t<sub>exp</sub> is calculated t value; <sup>2</sup>t<sub>std</sub> is obtained from table of Student's t-test, <sup>3</sup>F<sub>exp</sub> is calculated F value; <sup>4</sup>F<sub>std</sub> is obtained from the table of F test.



Table S4: Analysis of synthetic sample at FeTe<sub>2</sub>/GP electrode surface

| Samples   | Determined (μM) | Spiked (μM) | Found (μM) | Recovery (%) | RSD (%) |
|-----------|-----------------|-------------|------------|--------------|---------|
| <b>DA</b> | 30.22           | 10          | 40.14      | 99.2         | 1.6     |
|           |                 | 15          | 44.97      | 98.33        | 1.4     |
|           |                 | 20          | 50.24      | 100.1        | 1.1     |
|           |                 | 30          | 59.82      | 98.66        | 1.5     |
| <b>UA</b> | 20.38           | 10          | 30.62      | 102.4        | 1.2     |
|           |                 | 20          | 40.45      | 100.4        | 1.5     |
|           |                 | 30          | 51.22      | 102.8        | 2.2     |
|           |                 | 40          | 60.87      | 101.2        | 2.1     |
| <b>GU</b> | 20.46           | 10          | 30.22      | 97.6         | 1.5     |
|           |                 | 20          | 40.65      | 100.9        | 1.1     |
|           |                 | 30          | 51.25      | 102.6        | 2.4     |
|           |                 | 40          | 61.18      | 101.8        | 1.8     |
| <b>AD</b> | 30.58           | 10          | 40.84      | 102.6        | 1.7     |
|           |                 | 15          | 46.02      | 102.9        | 2.8     |
|           |                 | 20          | 50.19      | 98.05        | 1.4     |
|           |                 | 30          | 61.11      | 101.7        | 1.2     |
